# Supplementary material
Source: publisher figshare collection journal article supplement (https://acs.figshare.com/ndownloader/files/3842584)
Supplement: Supplementary file 1 [file 3842584]

Maura J. Donohue<sup>1\*\*</sup>, Jatin H. Mistry<sup>2</sup>, Joyce M. Donohue<sup>3</sup>, Katharine O'Connell<sup>4</sup>, Dawn King<sup>1</sup>,  
Jules Byran<sup>4</sup>, Terry Covert<sup>5</sup> and Stacy Pfaller<sup>1</sup>

**Increased Frequency of Nontuberculous Mycobacteria Detection at Potable Water Taps  
within the United States**

Number of Pages: 2 (includes coversheet)

Table S1: Summary of sampling process used by each NTM occurrence study

|                      | Study                                       | von Reyn <i>et al.</i> ,<br>1993                    | Glover <i>et al.</i> ,<br>1994 | Covert <i>et al.</i> ,<br>1999 | Falkinham <i>et al.</i> ,<br>2001                    | Hilborn <i>et al.</i> ,<br>2006 | This study                         |
|----------------------|---------------------------------------------|-----------------------------------------------------|--------------------------------|--------------------------------|------------------------------------------------------|---------------------------------|------------------------------------|
| Sample collection    | Flush time                                  | First pull                                          | First pull                     | 1 to 2 min                     | Not reported                                         | First pull                      | 15 sec                             |
|                      | Sample preservative                         | Sodium thiosulfate                                  | Sodium thiosulfate             | Sodium thiosulfate             | Sodium thiosulfate                                   | Sodium thiosulfate              | Not added                          |
| Sample treatment     | Decontamination                             | None                                                | CPC* %0.04                     | CPC %0.04                      | None                                                 | CPC %0.04                       | CPC %0.04                          |
|                      | Decontamination time                        |                                                     | 24 hr.                         | 30 min                         |                                                      | 30 min                          | 30 min                             |
| Sample concentrating | Concentration method                        | Centrifugation@<br>5,000 g,<br>Spread plate 0.1 mL  | Vacuum filtration<br>500 mL    | Vacuum filtration<br>500 mL    | Centrifugation@<br>5,000 g,<br>Spread plate 0.1 mL   | Vacuum filtration<br>500 mL     | Vacuum filtration<br>500 mL        |
|                      | Volume of water represented in NTM recovery | 2.5 mL/plate<br>3 plates<br>7.5 mL analyzed         | 500 mL                         | 500 mL                         | 30 mL/plate<br>5 plates<br>150 mL analyzed           | 500 mL                          | 500 mL                             |
| NTM isolation        | Media                                       | Tsukamura minimal-Tween 80 cycloheximide agar media | Middlebrook 7 H10              | Middlebrook 7 H10              | Middlebrook 7H10                                     | Middlebrook 7H10                | Middlebrook 7H10                   |
|                      | Incubation Time                             | Eight weeks                                         | Eight weeks,                   | Eight weeks                    | Three weeks                                          | Eight weeks                     | Eight weeks                        |
|                      | Incubation Temperature                      | 37 °C                                               | 37 °C                          | 37 °C                          | 37 °C                                                | 37 °C                           | 37 °C                              |
| Identification       | Presumptive NTM                             | Acid fast                                           | Acid fast                      | Acid fast                      | Acid fast                                            | Acid fast                       |                                    |
|                      | MAC identification                          | DNA probes (SNAP or Gen-Probe)                      | DNA probes (Syngene)           | 16S partial sequencing         | Multiplex PCR                                        | Multi locus electrophoresis     | 16S partial and <i>hsp65</i> genes |
|                      | NTM identification excluding MAC isolates   | Not done                                            | Biochemical screening          | 16S partial sequencing         | Endonuclease digest <i>hsp65</i> (BstEII and HaeIII) | HPLC mycolic acid               | 16S partial and <i>hsp65</i> genes |

\*CPC, cetylpyridinium chloride

Table S1: Summary of sampling approach used by each NTM occurrence study.
